# Supplementary material for: Whole genome analysis of halotolerant and alkalotolerant plant growth-promoting rhizobacterium Klebsiella sp. D5A
Source: PubMed Central journal article supplement (PMC4877636; doi:10.1038/srep26710), 2016-05-24
Supplement: srep26710-s1.pdf [file srep26710-s1.pdf]

Whole genome analysis of halotolerant and alkalotolerant plant growth-promoting  
rhizobacterium *Klebsiella* sp. D5A

Wuxing Liu<sup>1,\*</sup>, Qingling Wang<sup>1</sup>, Jinyu Hou<sup>1</sup>, Tu Chen<sup>2</sup>, Yongming Luo<sup>2</sup>, Peter Christie<sup>1</sup>

Corresponding author

WX Liu (✉) Key Laboratory of Soil Environment and Pollution Remediation, Institute of Soil Science,  
Chinese Academy of Sciences, Nanjing 210008, China.

E-mail: [liuwuxin@issas.ac.cn](mailto:liuwuxin@issas.ac.cn)

<sup>1</sup> Key Laboratory of Soil Environment and Pollution Remediation, Institute of Soil Science, Chinese  
Academy of Sciences, Nanjing 210008, China.

<sup>2</sup> Institute of Coastal Zone Research, Chinese Academy of Sciences, Yantai 264003, China.

Table S1 Genes related to PGP traits

|                                            | Gene ID    | COG ID  | Gene annotation                                                         | KO/Gene_ID | KEGG_GENE_NAME |
|--------------------------------------------|------------|---------|-------------------------------------------------------------------------|------------|----------------|
|                                            | ORF        |         |                                                                         |            |                |
| Indole-3-acetic acid<br>(IAA) biosynthesis | orf03176_1 |         | nitrile hydratase, alpha subunit                                        | K01721     | nthA           |
|                                            | orf03175_1 |         | nitrile hydratase, beta subunit                                         | K01721     | nthB           |
|                                            | orf03759_1 | COG3961 | indole-3-pyruvate decarboxylase                                         | K04103     | ipdC           |
|                                            | orf03177_1 | COG0154 | amidase                                                                 | K01426     | amiE           |
|                                            | orf00635_1 | COG1012 | aldehyde dehydrogenase                                                  | K00128     | E1.2.1.3       |
| Phosphate<br>solubilization                | orf03914_1 | _       | coenzyme PQQ synthesis protein D                                        | K06138     | pqqD           |
|                                            | orf03915_1 | COG1235 | pyrroloquinoline quinone biosynthesis protein PqqB                      | K06136     | pqqB           |
|                                            | orf03916_1 | COG0535 | pyrroloquinoline quinone biosynthesis protein PqqE                      | K06139     | pqqE           |
|                                            | orf03917_1 | COG1025 | coenzyme PQQ biosynthesis protein PqqF                                  | _          | pqqF           |
|                                            | orf03918_1 | COG5424 | pyrroloquinoline quinone biosynthesis protein PqqC                      | K06137     | pqqC           |
|                                            | orf01964_1 | COG4993 | quinoprotein glucose dehydrogenase                                      | K00117     | gcd            |
| Phosphate uptake                           | orf04595_1 | COG0226 | phosphate ABC transporter periplasmic substrate-binding<br>protein PstS | K02040     | pstS           |
|                                            | orf04594_1 | COG0573 | phosphate transporter permease subunit PstC                             | K02037     | pstC           |
|                                            | orf04593_1 | COG0581 | phosphate transporter permease subunit PtsA                             | K02038     | pstA           |
|                                            | orf04592_1 | COG1117 | phosphate transporter subunit                                           | K02036     | pstB           |
|                                            | orf01743_1 | COG0306 | low-affinity inorganic phosphate transporter                            | K16322     | pit            |
|                                            | orf04108_1 | COG3638 | phosphonate ABC transporter, ATP-binding protein                        | K02042     | phnC           |
|                                            | orf04109_1 | COG3221 | phosphonate ABC transporter, periplasmic phosphonate-binding<br>protein | K05781     | phnD           |
|                                            | orf04111_1 | COG3639 | phosphonate ABC transporter, permease protein                           | K06163     | phnE1          |
|                                            | orf04110_1 | COG3639 | phosphonate ABC transporter, permease protein                           | K06166     | phnE2          |

|                        |            |                 |                                                               |        |                                                      |
|------------------------|------------|-----------------|---------------------------------------------------------------|--------|------------------------------------------------------|
| Siderophore production | orf00726_1 | COG1028         | 2,3-dihydroxybenzoate-2,3-dehydrogenase                       | K00216 | entA                                                 |
|                        | orf00725_1 | COG3433;COG1535 | 2,3-dihydro-2,3-dihydroxybenzoate synthetase, isochroismatase | K01252 | entB, dhhB, vibB, mxcF                               |
|                        | orf00724_1 | COG1021         | enterobactin synthase subunit E                               | K02363 | entE, dhhE, vibE, mxcE                               |
|                        | orf00723_1 | COG1169         | isochorismate synthase EntC                                   | K02361 | entC                                                 |
|                        | orf00721_1 | COG0477         | enterobactin exporter EntS                                    | K08225 | entS                                                 |
|                        | orf00717_1 | COG1020;COG3319 | enterobactin synthase subunit F                               | K02364 | entF                                                 |
|                        | orf00713_1 | COG2977         | 4'-phosphopantetheinyl transferase EntD                       | K02362 | entD                                                 |
| Fe uptake              | orf01388_1 | COG4771         | colicin I receptor FepA                                       | K16089 | TC.FEV.OM2, fepA, iroN, cirA, pfeA, cfrA, hmuR       |
|                        | orf00714_1 | COG4771         | outer membrane receptor/ferric enterobactin receptor FepA     | K16089 | TC.FEV.OM2, fepA, iroN, cirA, pfeA, cfrA, hmuR       |
|                        | orf02458_1 | COG4771         | outer membrane receptor/ferric enterobactin receptor FepA     | K16089 | TC.FEV.OM2, fepA, iroN, cirA, pfeA, cfrA, hmuR       |
|                        | orf04037_1 | COG4774         | catecholate siderophore receptor fiu                          | K16090 | fiu                                                  |
|                        | orf00543_1 | COG1629         | TonB-dependent receptor                                       |        | TC.FEV.OM3, tbpA, hemR, lbpA, hpuB, bhur, hugA, hmbR |
|                        | orf00577_1 | _               | hypothetical protein(TonB-dependent siderophore receptor)     |        | TC.FEV.OM                                            |
|                        | orf02635_1 | COG1629         | TonB-dependent siderophore receptor                           |        | tonB                                                 |
|                        | orf02824_1 | COG1629         | TonB-dependent receptor                                       |        | ABC.FEV.P                                            |
|                        | orf03828_1 | COG1629         | TonB-dependent receptor                                       |        | TC.FEV.OM                                            |
|                        | orf04232_1 | COG1629         | ferric aerobactin receptor                                    | K02014 | TC.FEV.OM                                            |
|                        | orf03486_1 | COG1629         | ferrioxamine receptor foxA                                    | K02014 | TC.FEV.OM                                            |
|                        | orf01930_1 | COG1629         | ferrichrome outer membrane receptor                           | K02014 | TC.FEV.OM                                            |
|                        | orf00816_1 | COG0735         | ferric uptake regulator                                       |        | fur                                                  |

|              |            |         |                                                                                          |        |            |
|--------------|------------|---------|------------------------------------------------------------------------------------------|--------|------------|
| Fe transport | orf01825_1 | COG1918 | ferrous iron transport protein A                                                         | K04758 | feoA       |
|              | orf01824_1 | COG0370 | ferrous iron transport protein B                                                         | K04759 | feoB       |
|              | orf01823_1 | _       | hypothetical protein; May function as a transcriptional regulator that controls feoABC   | K07490 | feoC       |
|              | orf00551_1 | COG1121 | iron transporter: fur regulated                                                          | K11607 | sitB       |
|              | orf00550_1 | COG1108 | iron ABC transporter, permease protein AfeC                                              | K11605 | sitC       |
|              | orf00552_1 | COG0803 | iron transport system periplasmic binding component                                      | K11604 | sitA       |
|              | orf00549_1 | COG1108 | iron ABC transporter, permease protein AfeD                                              | K11606 | sitD       |
|              | orf03856_1 | COG1178 | ABC transporter, permease protein; Part of a binding-protein-dependent transport system. |        | afuB, fbpB |
|              | orf02844_1 | COG1120 | ABC transporter, iron chelate uptake transporter (FeCT) family, ATP-binding protein      | K02013 | ABC.FEV.A  |
|              | orf02844_1 | COG1120 | ABC transporter, iron chelate uptake transporter (FeCT) family, ATP-binding protein      | K02013 | ABC.FEV.A  |
|              | orf02843_1 | COG0609 | iron-siderophore ABC transporter permease                                                |        | TC.FEV.OM  |
|              | orf02843_1 | COG0609 | ABC transporter, iron chelate uptake transporter (FeCT) family, permease protein         | K02015 | ABC.FEV.P  |
|              | orf02842_1 | COG0614 | ABC transporter, iron chelate uptake transporter (FeCT) family                           |        | ABC.FEV.S  |
|              | orf02842_1 | COG0614 | ABC transporter, iron chelate uptake transporter (FeCT) family                           | K02016 | ABC.FEV.S  |
|              | orf02717_1 | COG0810 | transport protein TonB                                                                   | K03832 | TC.FEV.OM  |
|              | orf02681_1 | COG1120 | iron ABC transporter, ATP-binding protein                                                | K02013 | ABC.FEV.A  |
|              | orf02680_1 | COG0609 | iron ABC transporter, permease protein                                                   | K02015 | ABC.FEV.P  |
|              | orf02679_1 | COG0614 | iron ABC transporter, periplasmic iron-binding protein                                   | K02016 | ABC.FEV.S  |
|              | orf02656_1 | COG1120 | iron chelate ABC transporter, ATP-binding protein                                        | K02013 | ABC.FEV.A  |
|              | orf02655_1 | COG0609 | iron chelate ABC transporter, permease protein                                           | K02015 | ABC.FEV.P  |

|            |         |                                                                        |        |            |
|------------|---------|------------------------------------------------------------------------|--------|------------|
| orf02654_1 | COG0614 | iron chelate ABC transporter, periplasmic iron chelate-binding protein | K02016 | ABC.FEV.S  |
| orf02634_1 | COG1120 | iron ABC transporter, ATP-binding protein                              | K02013 | ABC.FEV.A  |
| orf02633_1 | COG0609 | iron ABC transporter, permease protein                                 | K02015 | ABC.FEV.P  |
| orf02632_1 | COG0609 | iron ABC transporter, permease protein                                 | K02015 | ABC.FEV.P  |
| orf02631_1 | COG0614 | iron ABC transporter, periplasmic iron-binding protein                 | K02016 | ABC.FEV.S  |
| orf02617_1 | -       | -                                                                      | K02013 | ABC.FEV.A  |
| orf02616_1 | -       | -                                                                      | K02015 | ABC.FEV.P  |
| orf02615_1 | -       | -                                                                      | K02016 | ABC.FEV.S  |
| orf02127_1 | COG4114 | ferric iron reductase involved in ferric hydroxamate transport         | K13255 | fhuF       |
| orf01929_1 | COG1120 | iron-hydroxamate transporter ATP-binding subunit                       | K02013 | ABC.FEV.A  |
| orf01928_1 | COG0614 | iron-hydroxamate transporter substrate-binding subunit                 | K02016 | ABC.FEV.S  |
| orf01927_1 | COG0609 | iron-hydroxamate transporter permease subunit                          | K02015 | ABC.FEV.P  |
| orf01099_1 | COG1178 | iron(III) ABC transporter, permease protein;                           |        | afuB, fbpB |
| orf01098_1 | COG1840 | iron(III) ABC transporter, periplasmic iron(III)-binding protein       |        | afuA, fbpA |
| orf00722_1 | COG4592 | iron-enterobactin transporter periplasmic binding protein              | K02016 | ABC.FEV.S  |
| orf00720_1 | COG0609 | ferric enterobactin (enterochelin) transport                           |        | ABC.FEV.P  |
| orf00720_1 | COG0609 | ferric enterobactin (enterochelin) transport                           | K02015 | ABC.FEV.P  |
| orf00719_1 | COG4779 | iron-enterobactin transporter permease                                 | K02015 | ABC.FEV.P  |
| orf00718_1 | COG1120 | iron-enterobactin transporter ATP-binding protein                      | K02013 | ABC.FEV.A  |
| orf00541_1 | COG4558 | hemin ABC transporter, periplasmic hemin-binding protein               | K02016 | ABC.FEV.S  |
| orf00540_1 | COG0609 | hemin ABC transporter, permease protein                                | K02015 | ABC.FEV.P  |
| orf00539_1 | COG4559 | hemin importer ATP-binding subunit                                     | K02013 | ABC.FEV.A  |
| orf00231_1 | COG0848 | biopolymer transport protein ExbD                                      | K03559 | exbD       |
| orf00230_1 | COG0811 | biopolymer transport protein ExbB                                      | K03561 | exbB       |

|                                       |            |                                  |                                                                                 |                |                             |
|---------------------------------------|------------|----------------------------------|---------------------------------------------------------------------------------|----------------|-----------------------------|
| Acetoin and 2, 3-butanediol synthesis | orf04628_1 | COG3978                          | acetolactate synthase 2 regulatory subunit                                      | K11258         | ilvM                        |
|                                       | orf02240_1 | COG3962                          | putative acetolactate synthase large subunit                                    | K03336         | iolD                        |
|                                       | orf02015_1 | COG0440                          | acetolactate synthase 3 regulatory subunit                                      | K01653         | E2.2.1.6S, ilvH, ilvN       |
|                                       | orf04551_1 | COG0440                          | acetolactate synthase 1 regulatory subunit                                      | K01653         | E2.2.1.6S, ilvH, ilvN       |
|                                       | orf02016_1 | COG0028                          | acetolactate synthase 3 catalytic subunit                                       | K01652         | E2.2.1.6L, ilvB, ilvG, ilvI |
|                                       | orf02580_1 | COG0028                          | acetolactate synthase                                                           | K01652         | E2.2.1.6L, ilvB, ilvG, ilvI |
|                                       | orf00545_1 | COG0028                          | acetolactate synthase catalytic subunit                                         | K01652         | E2.2.1.6L, ilvB, ilvG, ilvI |
|                                       | orf03057_1 | COG0028                          | acetolactate synthase large subunit                                             | K01576         | mdIC                        |
|                                       | orf02581_1 | COG1028                          | acetoin reductase                                                               | K03366         | butA, budC                  |
| orf02579_1                            | COG3527    | alpha-acetolactate decarboxylase | K01575                                                                          | E4.1.1.5, alsD |                             |
| Antimicrobial compounds               |            |                                  |                                                                                 |                |                             |
| Phenazine production                  | orf03100_1 | COG0384                          | phenazine biosynthesis protein PhzF family                                      |                |                             |
| 4-hydroxybenzoate production          | orf02481_1 | COG3161                          | chorismate pyruvate lyase                                                       |                | ubiC                        |
| Chitinase production                  | orf04356_1 | COG3325                          | putative chitinase II                                                           | K01183         | E3.2.1.14                   |
| $\gamma$ -aminobutyric acid (GABA)    | orf01112_1 | COG1012                          | putative succinate-semialdehyde dehydrogenase (NAD(P)(+))                       | K00135         | gabD                        |
|                                       | orf04143_1 | COG1012                          | succinate-semialdehyde dehydrogenase I                                          | K00135         | gabD                        |
|                                       | orf02181_1 | COG1012                          | aldehyde dehydrogenase (NAD) family protein                                     | K00135         | gabD                        |
|                                       | orf04144_1 | COG0160                          | 4-aminobutyrate aminotransferase                                                | K07250         | gabT                        |
|                                       | orf04145_1 | COG1113                          | gamma-aminobutyrate transporter                                                 | K11735         | gabP                        |
| Other PGPR fitness conferring genes   |            |                                  |                                                                                 |                |                             |
|                                       | orf00281_1 | COG1166                          | arginine decarboxylase                                                          | K01585         | E4.1.1.19S, speA            |
|                                       | orf00282_1 | COG0010                          | agmatinase; Catalyzes the formation of putrescine from agmatine (By similarity) | K01480         | E3.5.3.11, speB             |
|                                       | orf01969_1 | COG0421                          | spermidine synthase                                                             | K00797         | speE, SRM                   |

| Resistance to oxidative stress |            |                                    |                                          |        |                       |
|--------------------------------|------------|------------------------------------|------------------------------------------|--------|-----------------------|
| Peroxidase                     | orf03876_1 | COG2128;COG4950                    | putative peroxidase                      | None   | _                     |
|                                | orf01147_1 | COG2837                            | deferrochelataase/oxidase EfeB           | K16301 | efeB                  |
|                                | orf03730_1 | COG2837                            | dyp-type oxidase family protein          | K07223 | K07223                |
|                                | orf04367_1 | COG0386                            | glutathione oxidase family protein       | K00432 | E1.11.1.9             |
|                                | orf03910_1 | COG0376                            | catalase/oxidase HPI                     | K03782 | katG                  |
|                                | orf02698_1 | COG0386                            | putative glutathione oxidase             | K00432 | E1.11.1.9             |
|                                | orf03689_1 | COG1225                            | thioredoxin-dependent thiol oxidase      | K03564 | BCP, PRXQ, DOT5       |
|                                | orf03969_1 | COG2077                            | thiol oxidase                            | K11065 | tpx                   |
| Catalase                       | orf04050_1 | COG0753                            | hydroperoxidase II;                      | K03781 | katE, CAT, catB, srpA |
|                                | orf03910_1 | COG0376                            | catalase/oxidase HPI                     | K03782 | katG                  |
|                                | orf04443_1 | COG3546                            | putative manganese containing catalase   | K07217 | K07217                |
| Superoxide dismutase           | orf04808_1 | COG0605                            | superoxide dismutase                     | K04564 | SOD2                  |
|                                | orf04489_1 | COG0605                            | superoxide dismutase                     | K04564 | SOD2                  |
|                                | orf04818_1 | COG2032                            | superoxide dismutase                     | K04565 | SOD1                  |
|                                | orf00329_1 | _                                  | putative superoxide dismutase, iron      | _      | _                     |
| Glutathione S-transferase      | orf02200_1 | COG0346                            | glutathione transferase, FosA            | _      | _                     |
|                                | orf03847_1 | COG0625                            | glutathione S-transferase domain protein | K11208 | yncG                  |
|                                | orf03255_1 | COG0625                            | glutathione S-transferase                | K00799 | GST, gst              |
|                                | orf04138_1 | COG0625                            | glutathione S-transferase family protein | K00799 | GST, gst              |
|                                | orf00702_1 | COG0625                            | putative S-transferase                   | _      | _                     |
|                                | orf02440_1 | COG0625                            | putative glutathione S-transferase       | K00799 | GST, gst              |
|                                | orf01661_1 | COG0625                            | putative glutathione S-transferase       | _      | _                     |
|                                | orf00235_1 | COG0625                            | putative glutathione S-transferase YghU  | K11209 | yghU                  |
| orf01497_1                     | COG0625    | putative glutathione S-transferase | _                                        | _      |                       |

|               |            |         |                                                                               |        |                        |
|---------------|------------|---------|-------------------------------------------------------------------------------|--------|------------------------|
|               | orf00973_1 | COG0625 | glutathione S-transferase family protein                                      | –      | –                      |
|               | orf01734_1 | COG0625 | glutathione S-transferase domain protein                                      | K00799 | GST, gst               |
|               | orf01496_1 | COG0625 | glutathione S-transferase domain protein                                      | –      | –                      |
| Hydroperoxide | orf03015_1 | COG0450 | putative thiol - alkyl hydroperoxide reductase                                | K03386 | E1.11.1.15, PRDX, ahpC |
|               | orf00764_1 | COG3634 | alkyl hydroperoxide reductase subunit F                                       | K03387 | ahpF                   |
|               | orf00763_1 | COG0450 | alkyl hydroperoxide reductase subunit C                                       | K03386 | E1.11.1.15, PRDX, ahpC |
| Heat shock    | orf00667_1 | COG0576 | heat shock protein GrpE;                                                      | K03687 | GRPE                   |
|               | orf01089_1 | COG3785 | heat shock protein HspQ;                                                      | K11940 | hspQ                   |
|               | orf01317_1 | COG0443 | DnaK domain protein                                                           | K04046 | yegD                   |
|               | orf01832_1 | COG1188 | ribosome-associated heat shock protein HSP15                                  | K04762 | hslR                   |
|               | orf02078_1 | COG0484 | chaperone protein DnaJ; Participates actively in the response to hyperosmotic | K03686 | dnaJ                   |
|               | orf02079_1 | COG0443 | molecular chaperone DnaK; Acts as a chaperone                                 | K04043 | dnaK                   |
|               | orf02376_1 | COG0459 | chaperonin GroEL;                                                             | K04077 | groEL, HSPD1           |
|               | orf02377_1 | COG0234 | co-chaperonin GroES                                                           | K04078 | groES, HSPE1           |
|               | orf02914_1 | COG0326 | heat shock protein 90                                                         | K04079 | htpG, HSP90A           |
|               | orf03065_1 | COG0071 | Heat shock protein20/alpha crystallin family protein                          | K04080 | ibpA                   |
|               | orf03423_1 | COG3187 | heat shock protein HslJ                                                       | K03668 | hslJ                   |
|               | orf03528_1 | COG0501 | heat shock protein HtpX                                                       | K03799 | htpX                   |
|               | orf03650_1 | COG0443 | chaperone protein HscA                                                        | K04044 | hscA                   |
|               | orf04566_1 | COG0071 | heat shock chaperone IbpB                                                     | K04081 | ibpB                   |
|               | orf04567_1 | COG0071 | heat shock protein IbpA                                                       | K04080 | ibpA                   |
| Cold shock    | orf01682_1 | COG1278 | major cold shock protein                                                      | K03704 | cspA                   |
|               | orf00770_1 | COG1278 | cold shock protein CspE                                                       | K03704 | cspA                   |
|               | orf04877_1 | COG1278 | 'cold-shock' DNA-binding domain protein                                       | K03704 | cspA                   |



|                       |            |                 |                                                    |        |                   |
|-----------------------|------------|-----------------|----------------------------------------------------|--------|-------------------|
|                       | orf01018_1 | COG1278         | DNA replication inhibitor                          | K03704 | cspA              |
| Rhodanese: catalysis  | orf02644_1 | COG0607         | rhodanese-like protein sulfurtransferase           | None   | –                 |
| of the detoxification | orf00629_1 | COG0607         | rhodanese domain protein                           | None   | –                 |
| of cyanide            | orf01204_1 | COG0476;COG0607 | putative thiazole biosynthesis adenylyltransferase | K11996 | MOCS3, UBA4, moeB |
|                       | orf04193_1 | COG1054         | ThiF/rhodanese domain protein                      |        |                   |
|                       | orf04193_1 | COG1054         | sulfurtransferase rhodanese                        | K07146 | K07146            |
|                       | orf03085_1 | COG0607         | rhodanese                                          | None   | –                 |
|                       | orf01645_1 | COG0607         | rhodanese domain protein                           | None   | –                 |

Table S2 General genome features of the five studied *Klebsiella* genomes

| <i>Klebsiella</i> sp.                 | D5A          | <i>variicola</i> At22 | <i>variicola</i> DX120 | <i>variicola</i> 342 | <i>pneumoniae</i> 78578 |
|---------------------------------------|--------------|-----------------------|------------------------|----------------------|-------------------------|
| Genome size (bp)                      | 5540009      | 5458505               | 5718430                | 5920260              | 5694890                 |
| G+C content (%)                       | 57.2         | 57.6                  | 57.1                   | 56.9                 | 57.2                    |
| Protein-coding genes                  | 4999         | 5113                  | 5342                   | 5554                 | 5652                    |
| No. of protein-coding genes with COGs | 4684         | 4979                  | 5195                   | 5369                 | 5453                    |
| rRNA genes                            | 4            | 25                    | 25                     | 25                   | 25                      |
| tRNA genes                            | 73           | 85                    | 87                     | 88                   | 86                      |
| Other RNA genes                       | –            | 2                     | 1                      | 1                    | 1                       |
| Plasmid                               | –            | –                     | 2                      | 2                    | 5                       |
| Accession number                      | LOAR00000000 | NC_013850.1           | NZ_CP009274.1          | NC_011283.1          | NC_009648.1             |

Table S3 Genes involved in the N cycle

|                        | Gene ID<br>ORF | COG ID                      | Gene annotation                                           | KO/Gene_<br>ID | KEGG_GENE_NA<br>ME |
|------------------------|----------------|-----------------------------|-----------------------------------------------------------|----------------|--------------------|
| Nitrogenase<br>complex | orf01255_1     | COG0674;COG1014;C<br>OG1013 | pyruvate-flavodoxin oxidoreductase                        | K03737         | nifJ               |
|                        | orf01256_1     | COG1348                     | nitrogenase iron protein                                  | K02588         | nifH               |
|                        | orf01257_1     | COG2710                     | nitrogenase molybdenum-iron protein alpha chain           | K02586         | nifD               |
|                        | orf01258_1     | COG2710                     | nitrogenase molybdenum-iron protein beta chain            | K02591         | nifK               |
|                        | orf01259_1     | _                           | probable nitrogen fixation protein FixT                   | K02593         | nifT               |
|                        | orf01260_1     | _                           | NifY protein                                              | None           | nifY               |
|                        | orf01261_1     | COG2710                     | nitrogenase MoFe cofactor biosynthesis protein NifE       | K02587         | nifE               |
|                        | orf01262_1     | COG2710                     | nitrogenase molybdenum-cofactor biosynthesis protein NifN | K02592         | nifN               |
|                        | orf01263_1     | _                           | NifX protein                                              | K02596         | nifX               |
|                        | orf01265_1     | COG1104                     | cysteine desulfurase NifS                                 | K04487         | nifS               |
|                        | orf01266_1     | COG0119                     | homocitrate synthase                                      | K02594         | nifV               |
|                        | orf01267_1     | _                           | putative NifW protein                                     | K02595         | nifW               |
|                        | orf01268_1     | _                           | putative NifZ protein                                     | K02597         | nifZ               |
|                        | orf01269_1     | COG0760                     | nitrogen fixation protein NifM                            | K03769         | nifM               |
|                        | orf01270_1     | COG0716                     | flavodoxin FldA                                           | K03839         | nifF               |
|                        | orf01271_1     | COG2202                     | nitrogen fixation negative regulator NifL                 | None           | nifL               |
|                        | orf01272_1     | COG3604                     | Nif-specific regulatory protein                           | K02584         | nifA               |
|                        | orf01273_1     | COG0535                     | nitrogenase cofactor biosynthesis protein NifB            | K02585         | nifB               |
|                        | orf01274_1     | _                           | nitrogen fixation protein NifQ                            | K15790         | nifQ               |
|                        | orf03425_1     | COG0674;COG1014;C<br>OG1013 | putative pyruvate:ferredoxin (flavodoxin) oxidoreductase  | K03737         | nifJ               |
| orf03647_1             | COG0822        | scaffold protein            | K04488                                                    | iscU, nifU     |                    |

|             |            |         |                                                                          |        |      |
|-------------|------------|---------|--------------------------------------------------------------------------|--------|------|
| Nitrogenase | orf03772_1 | COG4657 | Na(+)-translocating NADH-quinone reductase subunit E                     | K03617 | rnfA |
| transport   | orf03771_1 | COG2878 | electron transport complex protein RnfB; Required for nitrogen fixation. | K03616 | rnfB |
|             | orf04836_1 | _       | electron transport complex protein rnfC                                  | K03615 | rnfC |
|             | orf04835_1 | COG4658 | electron transport complex protein RnfD; Required for nitrogen fixation. | K03614 | rnfD |
|             | orf04833_1 | COG4660 | NADH-ubiquinone oxidoreductase                                           | K03613 | rnfE |
|             | orf04834_1 | COG4659 | electron transport complex protein RnfG                                  | K03612 | rnfG |

Table S4 Genes involved in TCS

| orf        | COG ID          | Gene annotation                                                                    | KO/Gene_ID | KEGG_GENE_NAME | Func Name                                                                       |
|------------|-----------------|------------------------------------------------------------------------------------|------------|----------------|---------------------------------------------------------------------------------|
| orf00171_1 |                 |                                                                                    |            |                | two-component system NarL family, sensor histidine kinase                       |
| orf00823_1 | COG0745         | KDP operon transcriptional regulatory protein KdpE                                 | K07667     | kdpE           | two-component system, OmpR family, KDP operon response regulator KdpE           |
| orf00824_1 | COG2205         | sensor protein KdpD                                                                | K07646     | kdpD           | two-component system, OmpR family, sensor histidine kinase KdpD                 |
| orf00995_1 | COG2205;COG0642 | sensor histidine kinase                                                            | –          | –              |                                                                                 |
| orf01318_1 | COG2205         | sensor histidine kinase                                                            | –          | –              |                                                                                 |
| orf01356_1 | COG3275         | putative two-compoent regulatory system sensor kinase                              | K02478     | K02478         | two-component system, LytT family, sensor kinase                                |
| orf01443_1 | COG0642;COG2198 | phosphotransfer intermediate protein in two-component regulatory system with RcsBC | K07676     | rcsD           | two-component system, NarL family, sensor histidine kinase RcsD                 |
| orf01828_1 | COG0745         | osmolarity response regulator                                                      | K07659     | ompR           | two-component system, OmpR family, phosphate regulon response regulator OmpR    |
| orf01829_1 | COG0642         | osmolarity sensor protein                                                          | K07638     | envZ           | two-component system, OmpR family, osmolarity sensor histidine kinase EnvZ      |
| orf02044_1 | COG3290         | sensor histidine kinase                                                            | K07700     | dpiB, citA     | two-component system, CitB family, cit operon sensor histidine kinase CitA      |
| orf02097_1 | COG0745         | DNA-binding response regulator CreB                                                | K07663     | creB           | two-component system, OmpR family, catabolic regulation response regulator CreB |
| orf02415_1 | COG0642;COG0784 | sensor histidine                                                                   | –          | –              |                                                                                 |

|            |                 |                                                                                      |        |            |                                                                                    |
|------------|-----------------|--------------------------------------------------------------------------------------|--------|------------|------------------------------------------------------------------------------------|
| orf02584_1 | COG0642         | kinase/response regulator<br>sensor histidine protein<br>kinase (RstA regulator)     | –      | –          |                                                                                    |
| orf02748_1 | COG3850         | nitrate/nitrite sensor protein<br>NarX                                               | K07673 | narX       | two-component system, NarL family, nitrate/nitrite sensor<br>histidine kinase NarX |
| orf02749_1 | COG2197         | transcriptional regulator<br>NarL                                                    | K07684 | narL       | two-component system, NarL family, nitrate/nitrite response<br>regulator NarL      |
| orf03182_1 | COG0642         | sensor histidine kinase                                                              | –      | –          |                                                                                    |
| orf03306_1 | COG3290         | sensory histidine kinase<br>DcuS                                                     | K07701 | dcuS       | two-component system, CitB family, sensor histidine kinase<br>DcuS                 |
| orf03631_1 | COG0642         | putative 2-component<br>sensor protein                                               | K07711 | glrK, qseE | two-component system, NtrC family, sensor histidine kinase<br>GlrK                 |
| orf03763_1 | COG3275         | sensor histidine kinase                                                              | K02478 | K02478     | two-component system, LytT family, sensor kinase                                   |
| orf03902_1 | COG3662         | hypothetical protein/<br>histidine kinase                                            | –      | –          | –                                                                                  |
| orf03922_1 | COG0642         | sensor histidine kinase                                                              | –      | –          | –                                                                                  |
| orf04277_1 | COG2200;COG2203 | histidine kinase/ cyclic<br>diguanylate<br>phosphodiesterase (EAL)<br>domain protein | –      | –          | –                                                                                  |
| orf04487_1 | COG0642         | two-component sensor<br>protein                                                      | K07640 | cpxA       | two-component system, OmpR family, sensor histidine<br>kinase CpxA                 |
| orf04549_1 | COG3851         | sensory histidine kinase<br>UhpB                                                     | K07675 | uhpB       | two-component system, NarL family, sensor histidine<br>kinase UhpB                 |

Table S5 Genes involved in salt tolerance

|                                                                | Gene ID    | COG ID  | Gene annotation                                                     | KO/Gene_ID | KEGG_GENE_NAME |
|----------------------------------------------------------------|------------|---------|---------------------------------------------------------------------|------------|----------------|
|                                                                | ORF        |         |                                                                     |            |                |
| Glycine-betaine synthesis                                      | orf00698_1 | COG1292 | choline transport protein BetT                                      | K02168     | betT, betS     |
|                                                                | orf00696_1 | COG1012 | betaine aldehyde dehydrogenase                                      | K00130     | betB, gbsA     |
|                                                                | orf00695_1 | COG2303 | choline dehydrogenase                                               | K00108     | betA, CHDH     |
|                                                                | orf00697_1 | COG1309 | transcriptional regulator BetI                                      | K02167     | betI           |
|                                                                | orf02401_1 | COG0477 | proline/glycine betaine transporter                                 | K03762     | proP           |
|                                                                | orf00615_1 | COG4176 | glycine betaine transporter membrane protein                        | K02001     | proW           |
|                                                                | orf00616_1 | COG4175 | glycine betaine/L-proline ABC transporter, ATP-binding protein      | K02000     | proV           |
|                                                                | orf00614_1 | COG2113 | glycine betaine transporter periplasmic subunit                     | K02002     | proX           |
|                                                                | orf01141_1 | COG0591 | sodium/proline symporter                                            | K11928     | putP           |
|                                                                | orf01114_1 | COG1292 | putative transporter                                                | K03451     | TC.BCT         |
| Trehalose metabolism                                           | orf03896_1 | COG0366 | putative trehalose synthase                                         | K05343     | treS           |
|                                                                | orf01732_1 | COG1626 | trehalase                                                           | K01194     | treA, treF     |
|                                                                | orf03581_1 | COG0380 | trehalose-6-phosphate synthase                                      | K00697     | otsA           |
|                                                                | orf03582_1 | COG1877 | trehalose-6-phosphate phosphatase                                   | K01087     | otsB           |
|                                                                | orf02262_1 | COG1609 | trehalose repressor                                                 | K03485     | treR1, treR    |
| Genes involved in Na <sup>+</sup> and K <sup>+</sup> transport | orf00035_1 | COG0471 | transporter, divalent anion:Na <sup>+</sup> symporter (DASS) family | None       | –              |
|                                                                | orf00070_1 | COG0530 | putative calcium/sodium:proton antiporter                           | K07301     | yrbG           |
|                                                                | orf01209_1 | COG0025 | Na <sup>+</sup> /H <sup>+</sup> antiporter                          | K03316     | TC.CPA1        |
|                                                                | orf01488_1 | COG0471 | transporter, divalent anion:Na <sup>+</sup> symporter (DASS) family | None       | –              |
|                                                                | orf02077_1 | COG3004 | pH dependent Na <sup>+</sup> /H <sup>+</sup> antiporter             | K03313     | nhaA           |
|                                                                | orf02438_1 | COG0025 | Na <sup>+</sup> /H <sup>+</sup> antiporter                          | K03316     | TC.CPA1        |
|                                                                | orf02493_1 | COG0385 | Na <sup>+</sup> symporter, BASS family                              | K03453     | TC.BASS        |
|                                                                | orf03496_1 | COG3067 | Sodium/proton antiporter; Na (+)/H (+) antiporter t                 | K03314     | nhaB           |

|            |                 |                                                                                                            |        |                      |
|------------|-----------------|------------------------------------------------------------------------------------------------------------|--------|----------------------|
| orf04048_1 | COG1823         | transporter, dicarboxylate/amino acid:cation (Na <sup>+</sup> or H <sup>+</sup> ) symporter (DAACS) family | K06956 | K06956               |
| orf00827_1 | COG2060         | potassium-transporting ATPase subunit A                                                                    | K01546 | kdpA                 |
| orf00826_1 | COG2216         | potassium-transporting ATPase subunit B                                                                    | K01547 | kdpB                 |
| orf00825_1 |                 | potassium-transporting ATPase subunit C                                                                    | K01548 | kdpC                 |
| orf02076_1 | COG0583         | transcriptional activator NhaR                                                                             | K03717 | nhaR                 |
| orf02724_1 | COG1226         | transporter, cation channel family                                                                         | K10716 | kch, trkA, mthK, pch |
| orf02910_1 | COG1226;COG4651 | putative cation:proton antiport protein                                                                    | K03455 | TC.KEF               |
| orf02923_1 | COG3264         | potassium efflux protein KefA                                                                              | K05802 | kefA, bspA, aefA     |
| orf03491_1 | COG3263         | potassium/proton antiporter                                                                                | K11105 | cvrA, nhaP2          |
| orf03883_1 | COG0221         | inorganic diphosphatase /potassium-transporting ATPase subunit C                                           | K01507 | ppa                  |
| orf04615_1 | COG3158         | potassium transport protein Kup                                                                            | K03549 | kup                  |
| orf04699_1 | COG0168         | potassium transporter                                                                                      | K03498 | trkH                 |
| orf04935_1 | COG0569         | potassium transporter peripheral membrane component                                                        | K03499 | trkA                 |



Table S6 Genes involved in pH wide adaptation

|           | Gene ID    | COG ID  | Gene annotation                                                                    | KO/Gene_ID | KEGG_GENE_NAME |
|-----------|------------|---------|------------------------------------------------------------------------------------|------------|----------------|
|           | ORF        |         |                                                                                    |            |                |
| Acid      | orf00827_1 | COG2060 | potassium-transporting ATPase subunit A                                            | K01546     | kdpA           |
| expressed | orf00826_1 | COG2216 | potassium-transporting ATPase subunit B                                            | K01547     | kdpB           |
|           | orf00825_1 | COG2156 | potassium-transporting ATPase subunit C                                            | K01548     | kdpC           |
|           | orf00824_1 | COG2205 | sensor protein KdpD                                                                | K07646     | kdpD           |
|           | orf00823_1 | COG0745 | KDP operon transcriptional regulatory protein KdpE                                 | K07667     | kdpE           |
|           | orf04595_1 | COG0226 | phosphate ABC transporter periplasmic substrate-binding protein PstS               | K02040     | pstS           |
|           | orf04594_1 | COG0573 | phosphate transporter permease subunit PstC                                        | K02037     | pstC           |
|           | orf04593_1 | COG0581 | phosphate transporter permease subunit PtsA                                        | K02038     | pstA           |
|           | orf04592_1 | COG1117 | phosphate transporter subunit                                                      | K02036     | pstB           |
|           | orf02866_1 | COG1982 | lysine decarboxylase 1                                                             | K01582     | ldcC, cadA     |
|           | orf01895_1 | COG1982 | lysine decarboxylase 2, constitutive                                               | K01582     | ldcC, cadA     |
|           | orf02966_1 | COG0776 | transcriptional regulator HU subunit beta                                          | K03530     | hupB           |
|           | orf04859_1 | COG0776 | transcriptional regulator HU subunit alpha                                         | K05787     | hupA           |
|           | orf00942_1 | COG0783 | DNA starvation/stationary phase protection protein Dps                             | K04047     | dps            |
|           | orf01957_1 | COG0853 | aspartate alpha-decarboxylase                                                      | K01579     | panD           |
|           | orf02969_1 | COG1219 | ATP-dependent protease ATP-binding subunit ClpX                                    | K03544     | clpX, CLPX     |
|           | orf02970_1 | COG0740 | ATP-dependent Clp protease proteolytic subunit                                     | K01358     | clpP, CLPP     |
|           | orf02477_1 | COG1974 | LexA repressor; Represses a number of genes involved in the response to DNA damage | K01356     | lexA           |
|           | orf00190_1 | COG0804 | urease subunit alpha                                                               | K01428     | ureC           |
|           | orf00191_1 | COG0832 | urease subunit beta                                                                | K01429     | ureB           |
|           | orf00192_1 | COG0831 | urease subunit gamma                                                               | K01430     | ureA           |

|           |            |                 |                                                                                                 |        |              |
|-----------|------------|-----------------|-------------------------------------------------------------------------------------------------|--------|--------------|
|           | orf00189_1 | COG2371         | urease accessory protein UreE                                                                   | K03187 | ureE         |
|           | orf00188_1 | COG0830         | urease accessory protein UreF                                                                   | K03188 | ureF         |
|           | orf00187_1 | COG0378         | urease accessory protein UreG                                                                   | K03189 | ureG         |
|           | orf00193_1 | COG0829         | urease accessory protein UreD                                                                   | K03190 | ureD, ureH   |
|           | orf02079_1 | COG0443         | molecular chaperone DnaK; Acts as a chaperone (By similarity)                                   | K04043 | dnaK         |
|           | orf02376_1 | COG0459         | chaperonin GroEL                                                                                | K04077 | groEL, HSPD1 |
|           | orf00173_1 |                 | HdeB family protein                                                                             |        |              |
| Alkaline  | orf03496_1 | COG3067         | sodium/proton antiporter; Na(+)/H(+) antiporter                                                 | K03314 | nhaB         |
| expressed | orf03491_1 | COG3263         | potassium/proton antiporter; Participates in control of cell volume in low-osmolarity condition | K11105 | cvrA, nhaP2  |
|           | orf02910_1 | COG1226;COG4651 | putative cation:proton antiport protein                                                         | K03455 | TC.KEF       |
|           | orf02761_1 | COG0387         | calcium/sodium:proton antiporter                                                                | K07300 | chaA, CAX    |
|           | orf02438_1 | COG0025         | Na <sup>+</sup> /H <sup>+</sup> antiporter                                                      | K03316 | TC.CPA1      |
|           | orf02077_1 | COG3004         | pH dependent Na <sup>+</sup> /H <sup>+</sup> antiporter                                         | K03313 | nhaA         |
|           | orf02076_1 | COG0583         | transcriptional activator NhaR                                                                  | K03717 | nhaR         |
|           | orf01209_1 | COG0025         | Na <sup>+</sup> /H <sup>+</sup> antiporter                                                      | K03316 | TC.CPA1      |
|           | orf00977_1 | COG0477         | multidrug translocase MdfA                                                                      | K08160 | cmr, mdfA    |
|           | orf04606_1 | COG0356         | ATP synthase subunit A; Key component of the proton channel;                                    | K02108 | ATPF0A, atpB |
|           | orf04604_1 | COG0711         | F0F1 ATP synthase subunit B                                                                     | K02109 | ATPF0B, atpF |
|           | orf04605_1 | COG0636         | F0F1 ATP synthase subunit C                                                                     | K02110 | ATPF0C, atpE |
|           | orf04602_1 | COG0056         | F0F1 ATP synthase subunit alpha                                                                 | K02111 | ATPF1A, atpA |
|           | orf04600_1 | COG0055         | F0F1 ATP synthase subunit beta                                                                  | K02112 | ATPF1B, atpD |
|           | orf04603_1 | COG0712         | F0F1 ATP synthase subunit delta                                                                 | K02113 | ATPF1D, atpH |
|           | orf04599_1 | COG0355         | F0F1 ATP synthase subunit epsilon                                                               | K02114 | ATPF1E, atpC |
|           | orf04601_1 | COG0224         | F0F1 ATP synthase subunit gamma                                                                 | K02115 | ATPF1G, atpG |

---

|            |         |                                             |        |      |
|------------|---------|---------------------------------------------|--------|------|
| orf04607_1 | COG3312 | FOF1 ATP synthase subunit I                 | K02116 | atpI |
| orf02722_1 | COG1502 | cardiolipin synthetase                      | K06131 | cls  |
| orf02485_1 | COG2182 | maltose ABC transporter periplasmic protein | K10108 | malE |
| orf03436_1 | COG2885 | OmpA domain protein                         | None   | -    |
| orf04704_1 | COG2885 | OmpA domain protein                         | None   | -    |
| orf00944_1 | COG3637 | outer membrane protein X                    | K11934 | ompX |
| orf03514_1 | COG1760 | L-serine deaminase                          | K01752 | sdaA |
| orf00491_1 | COG1760 | L-serine ammonia-lyase 2                    | K01752 | sdaA |

---

Table S7 Genes involved in degradation of aromatic compounds

| Gene ID<br>ORF | COG ID  | Gene annotation                                              | KO/Gene_ID | KEGG_GENE_NAME |
|----------------|---------|--------------------------------------------------------------|------------|----------------|
| orf02133_1     | COG0654 | 4-hydroxybenzoate 3-monooxygenase                            | K00481     | pobA           |
| orf02132_1     | COG2207 | transcriptional regulator PobR                               | None       | _              |
| orf03864_1     | COG4638 | 2-chlorobenzoate 1,2-dioxygenase, alpha subunit              | K05549     | benA-xylX      |
| orf03865_1     | COG5517 | 3-phenylpropionate dioxygenase beta subunit                  | K05550     | benB-xylY      |
| orf03800_1     | COG3135 | benzoate transporter family protein                          | K05782     | benE           |
| orf03867_1     | COG1028 | 1,6-dihydroxycyclohexa-2,4-diene-1-carboxylate dehydrogenase | K05783     | benD-xylL      |
| orf03866_1     | COG0543 | 2-chlorobenzoate 1,2-dioxygenase, electron transfer subunit  | K05784     | benC-xylZ      |
| orf03863_1     | COG3485 | catechol 1,2-dioxygenase                                     | K03381     | catA           |
| orf03861_1     | COG4948 | muconate cycloisomerase                                      | K01856     | catB           |
| orf03862_1     | COG4829 | muconolactone delta-isomerase                                | K03464     | catC           |
| orf03315_1     | COG0015 | 3-carboxy-cis,cis-muconate cycloisomerase                    | K01857     | pcaB           |
| orf00326_1     | COG0599 | carboxymuconolactone decarboxylase family protein            | K01607     | pcaC           |
| orf03120_1     | COG0599 | carboxymuconolactone decarboxylase family protein            | K01607     | pcaC           |
| orf03313_1     | COG0599 | 4-carboxymuconolactone decarboxylase                         | K01607     | pcaC           |
| orf04377_1     | _       | hypothetical protein                                         | K01607     | pcaC           |
| orf04471_1     | COG0599 | carboxymuconolactone decarboxylase family protein            | K01607     | pcaC           |
| orf03314_1     | COG0596 | 3-oxoadipate enol-lactonase                                  | K01055     | pcaD           |
| orf03787_1     | COG3485 | protocatechuate 3,4-dioxygenase, alpha subunit               | K00448     | pcaG           |
| orf03788_1     | COG3485 | protocatechuate 3,4-dioxygenase, beta subunit                | K00449     | pcaH           |
| orf03318_1     | COG1788 | 3-oxoadipate CoA-transferase, subunit A                      | K01031     | pcaI           |
| orf03317_1     | COG2057 | 3-oxoadipate CoA-transferase, subunit B                      | K01032     | pcaJ           |
| orf01684_1     | COG0477 | 4-hydroxybenzoate transporter                                | K08195     | pcaK           |
| orf02987_1     | COG0477 | 4-hydroxybenzoate transporter                                | K08195     | pcaK           |

|            |         |                                                                                    |        |      |
|------------|---------|------------------------------------------------------------------------------------|--------|------|
| orf02981_1 | COG1414 | transcriptional regulator, IclR family                                             | K02624 | pcaR |
| orf03319_1 | COG1414 | Pca regulon regulatory protein                                                     | K02624 | pcaR |
| orf03860_1 | COG1414 | transcriptional regulator, IclR family                                             | K02624 | pcaR |
| orf02646_1 | COG0477 | putative 3-hydroxyphenylpropionic transporter MhpT                                 | K05819 | mhpT |
| orf02653_1 | COG1414 | DNA-binding transcriptional activator MhpR                                         | K05818 | mhpR |
| orf02650_1 | COG0596 | 2-hydroxy-6-ketono-2,4-dienedioic acid hydrolase                                   | K05714 | mhpC |
| orf02651_1 | _       | 3-(2,3-dihydroxyphenyl)propionate dioxygenase                                      | K05713 | mhpB |
| orf02652_1 | COG0654 | 3-(3-hydroxyphenyl)propionate hydroxylase                                          | K05712 | mhpA |
| orf02648_1 | COG4569 | acetaldehyde dehydrogenase; Catalyzes the conversion of acetaldehyde to acetyl-CoA | K04073 | mhpF |
| orf02649_1 | COG3971 | 2-keto-4-pentenoate hydratase                                                      | K02554 | mhpD |
| orf02647_1 | COG0119 | 4-hydroxy-2-oxovalerate aldolase                                                   | K01666 | mhpE |

Table S8 Genes involved in the sulfur cycle

|                                            | Gene ID    | COG ID                          | Gene annotation                                         | KO/Gene_ID | KEGG_GENE_NAME |
|--------------------------------------------|------------|---------------------------------|---------------------------------------------------------|------------|----------------|
|                                            | ORF        |                                 |                                                         |            |                |
| Thiosulfate or sulfate                     | orf00517_1 | COG0583                         | transcriptional regulator CysB                          | K13634     | cysB           |
| transporter and convert-related genes      | orf01167_1 | COG0031                         | putative cysteine synthase B                            | K12339     | cysM           |
|                                            | orf03744_1 | COG0031                         | cysteine synthase B                                     | K12339     | cysM           |
|                                            | orf01649_1 | COG0765                         | amino acid ABC transporter, permease protein            | K10009     | ABC.CYST.P     |
|                                            | orf03733_1 | COG2981                         | putative sulfate transport protein CysZ                 | K06203     | cysZ           |
|                                            | orf00512_1 | COG4150                         | thiosulfate transporter subunit                         | K02048     | cysP, sbp      |
|                                            | orf02887_1 | COG1613                         | sulfate transporter subunit                             | K02048     | cysP, sbp      |
|                                            | orf00513_1 | COG4208                         | sulfate/thiosulfate transporter permease subunit        | K02047     | cysW           |
|                                            | orf01168_1 | COG0555                         | sulfate/thiosulfate transporter subunit                 | K02046     | cysU           |
|                                            | orf00514_1 | COG1118                         | sulfate/thiosulfate transporter subunit                 | K02045     | cysA           |
|                                            | orf02959_1 | COG0031                         | cysteine synthase A                                     | K01738     | cysK           |
|                                            | orf04011_1 | COG0031                         | pyridoxal-phosphate dependent enzyme                    | K01738     | cysK           |
|                                            | orf03731_1 | COG0175                         | sulfate adenylyltransferase subunit 2                   | K00957     | cysD           |
|                                            | orf01591_1 | COG2895                         | sulfate adenylyltransferase subunit 1                   | K00956     | cysN           |
|                                            | orf03734_1 | COG0529                         | adenylylsulfate kinase                                  | K00860     | cysC           |
|                                            | orf02306_1 | COG0175                         | phosphoadenosine phosphosulfate reductase               | K00390     | cysH           |
|                                            | orf03735_1 | COG0155                         | sulfite reductase subunit beta                          | K00381     | cysI           |
| orf01207_1                                 | COG0369    | sulfite reductase subunit alpha | K00380                                                  | cysJ       |                |
| Sulfonate or alkanesulfonate related genes | orf01069_1 | COG1116                         | aliphatic sulfonates transport ATP-binding subunit      | K15555     | ssuB           |
|                                            | orf01066_1 | COG1116                         | putative sulfonate ABC transporter, ATP-binding protein | K15555     | ssuB           |
|                                            | orf03957_1 | COG0600                         | alkanesulfonate transporter permease subunit            | K15554     | ssuC           |
|                                            | orf02641_1 | COG0600                         | putative sulfonate ABC transporter, permease protein    | K15554     | ssuC           |
|                                            | orf03958_1 | COG0715                         | putative ABC-type transport protein                     | K15553     | ssuA           |

|                     |            |         |                                                                                    |        |      |
|---------------------|------------|---------|------------------------------------------------------------------------------------|--------|------|
|                     | orf02639_1 | COG0715 | aliphatic sulfonates ABC transporter family, periplasmic substrate-binding protein | K15553 | ssuA |
|                     | orf01068_1 | COG0715 | aliphatic sulfonates ABC transporter, periplasmic sulfonate-binding protein        | K15553 | ssuA |
|                     | orf01067_1 | COG0715 | putative sulfonate ABC transporter, sulfonate-binding protein                      | K15553 | ssuA |
|                     | orf01065_1 | COG2141 | alkanesulfonate monooxygenase                                                      | K04091 | ssuD |
|                     | orf03959_1 | COG0431 | NAD(P)H-dependent FMN reductase                                                    | K00299 | ssuE |
| Taurine transporter | orf03341_1 | COG4521 | taurine ABC transporter, periplasmic taurine-binding protein                       | K15551 | tauA |
|                     | orf04083_1 | COG0600 | taurine transporter subunit; Part of a binding-protein-dependent transport system  | K15552 | tauC |
|                     | orf04084_1 | COG4525 | taurine transporter ATP-binding subunit                                            | K10831 | tauB |
|                     | orf04085_1 | COG2175 | taurine dioxygenase                                                                | K03119 | tauD |

Table S9 Genes involved in secretion systems

|     | Gene ID    | COG ID  | Gene annotation                                                                 | KO/Gene_ID | KEGG_GENE_NAME      |
|-----|------------|---------|---------------------------------------------------------------------------------|------------|---------------------|
|     | ORF        |         |                                                                                 |            |                     |
| tat | orf00773_1 | COG1826 | twin arginine translocase protein E                                             | K03425     | tatE                |
|     | orf02114_1 | COG0084 | hydrolase, TatD family                                                          | K03424     | tatD                |
|     | orf04222_1 | COG0084 | putative metallodependent hydrolase                                             | K03424     | tatD                |
|     | orf04688_1 | COG1826 | twin arginine translocase protein A                                             | K03116     | tatA                |
|     | orf04690_1 | COG0805 | twin-arginine protein translocation system subunit TatC                         | K03118     | tatC                |
|     | orf04689_1 | COG1826 | sec-independent translocase                                                     | K03117     | tatB                |
|     | orf04691_1 | COG0084 | DNase TatD                                                                      | K03424     | tatD                |
| sec | orf04837_1 | COG0690 | preprotein translocase subunit SecE                                             | K03073     | secE                |
|     | orf00091_1 | COG1314 | preprotein translocase subunit SecG                                             | K03075     | secG                |
|     | orf04927_1 | COG0201 | preprotein translocase subunit SecY; Involved in protein export (By similarity) | K03076     | secY                |
|     | orf03010_1 | COG0342 | preprotein translocase subunit SecD                                             | K03072     | secD                |
|     | orf03617_1 | COG3086 | SoxR reducing system protein RseC                                               | K03803     | rseC                |
|     | orf00217_1 | COG0642 | sensor protein QseC                                                             | K07645     | qseC                |
|     | orf03009_1 | COG0341 | preprotein translocase subunit SecF                                             | K03074     | secF                |
|     | orf01996_1 | _       | SecA regulator SecM                                                             | K13301     | secM                |
|     | orf01647_1 | COG1952 | preprotein translocase subunit SecB                                             | K03071     | secB                |
|     | orf01995_1 | COG0653 | preprotein translocase subunit SecA                                             | K03070     | secA                |
|     | orf02973_1 | COG3056 | hypothetical protein                                                            | K07286     | yajG                |
|     | orf03011_1 | COG1862 | preprotein translocase subunit YajC                                             | K03210     | yajC                |
|     | orf03167_1 | COG2188 | putative transcriptional regulator                                              | K03482     | yidP                |
|     | orf04561_1 | COG2149 | hypothetical protein                                                            | K00389     | yidH                |
|     | orf04579_1 | COG0706 | putative inner membrane protein translocase component YidC                      | K03217     | yidC, spoIIIJ, OXA1 |
|     | orf04564_1 | COG2188 | transcriptional regulator, GntR family                                          | K03482     | yidP                |



|         |            |         |                                                                                    |        |                  |
|---------|------------|---------|------------------------------------------------------------------------------------|--------|------------------|
|         | orf01521_1 | COG2188 | transcriptional regulator, GntR family                                             | K03482 | yidP             |
|         | orf00087_1 | COG0293 | 23S rRNA methyltransferase J                                                       | K02427 | rlmE, rrmJ, ftsJ |
|         | orf02010_1 | COG0768 | peptidoglycan synthetase FtsI                                                      | K03587 | ftsI             |
|         | orf02001_1 | COG1589 | cell division protein FtsQ                                                         | K03589 | ftsQ             |
|         | orf01774_1 | COG2884 | cell division protein FtsE                                                         | K09812 | ftsE             |
|         | orf03523_1 | COG0768 | putative peptidoglycan synthetase FtsI                                             | K03587 | ftsI             |
|         | orf01775_1 | COG2177 | cell division protein FtsX                                                         | K09811 | ftsX             |
|         | orf00521_1 | COG2919 | cell division protein FtsB; Required for the cell division process (By similarity) | K05589 | ftsB             |
|         | orf02005_1 | COG0772 | cell division protein FtsW                                                         | K03588 | ftsW, spoVE      |
|         | orf01773_1 | COG0552 | cell division protein FtsY                                                         | K03110 | ftsY             |
|         | orf01999_1 | COG0206 | cell division protein FtsZ;                                                        | K03531 | ftsZ             |
|         | orf00088_1 | COG0465 | ATP-dependent metalloprotease                                                      | K03798 | ftsH, hflB       |
|         | orf02000_1 | COG0849 | cell division protein FtsA                                                         | K03590 | ftsA             |
|         | orf01027_1 | COG1674 | cell division protein                                                              | K03466 | ftsK, spoIIIE    |
|         | orf02011_1 | COG3116 | cell division protein FtsL                                                         | K03586 | ftsL             |
|         | orf04478_1 | COG3087 | cell division protein FtsN                                                         | K03591 | ftsN             |
|         | orf00670_1 | COG0541 | signal recognition particle protein                                                | K03106 | SRP54, ffh       |
|         | orf03619_1 | COG0681 | signal peptidase I                                                                 | K03100 | lepB             |
|         | orf02072_1 | COG0597 | lipoprotein signal peptidase                                                       | K03101 | lspA             |
| Type I  | orf00209_1 | COG1538 | outer membrane channel protein                                                     | K12340 | tolC             |
|         | orf00413_1 | _       | hypothetical protein                                                               | None   | _                |
|         | orf01558_1 | COG1538 | putative outer membrane efflux protein                                             | None   | _                |
|         | orf00339_1 | COG1538 | putative outer membrane efflux protein MdtP                                        | K15550 | mdtP             |
| Type II | orf01935_1 | COG3031 | pullulanase secretion envelope protein PulC                                        | K02452 | gspC             |
|         | orf01940_1 | _       | pullulanase secretion protein PulH                                                 | K02457 | gspH             |
|         | orf01941_1 | COG2165 | pullulanase secretion protein PulI                                                 | K02458 | gspI             |

|          |            |         |                                                                               |        |                        |
|----------|------------|---------|-------------------------------------------------------------------------------|--------|------------------------|
|          | orf01936_1 | COG1450 | pullulanase secretion envelope protein PulD;                                  | K02453 | gspD                   |
|          | orf01942_1 | COG4795 | pullulanase secretion protein PulJ                                            | K02459 | gspJ                   |
|          | orf01938_1 | COG1459 | pullulanase secretion protein PulF                                            | K02455 | gspF                   |
|          | orf01939_1 | COG2165 | pullulanase G protein;                                                        | K02456 | gspG                   |
|          | orf01947_1 | COG1989 | pullulanase secretion protein PulO;                                           | K02464 | gspO                   |
|          | orf01943_1 | COG3156 | pullulanase secretion protein PulK                                            | K02460 | gspK                   |
|          | orf01933_1 | _       | pullulanase-specific type II secretion system component B                     | K02451 | gspB                   |
|          | orf01932_1 | _       | pullulanase secretion protein PulS                                            | K02465 | gspS                   |
|          | orf00238_1 | COG0754 | bifunctional glutathionylspermidine amidase/glutathionylspermidine synthetase | K01460 | gsp                    |
|          | orf01945_1 | COG3149 | pullulanase secretion protein PulM                                            | K02462 | gspM                   |
|          | orf01937_1 | COG2804 | pullulanase secretion protein PulE                                            | K02454 | gspE                   |
|          | orf01946_1 | _       | pullulanase secretion protein PulN                                            | K02463 | gspN                   |
|          | orf01944_1 | COG3297 | pullulanase secretion protein PulL                                            | K02461 | gspL                   |
| Type III | orf03073_1 | COG3395 | YgbK domain protein                                                           | None   | _                      |
|          | orf03105_1 | COG3395 | hypothetical protein                                                          | None   | _                      |
|          | orf04783_1 | _       | type III restriction enzyme, res subunit                                      | None   | _                      |
|          | orf01416_1 | COG1061 | putative helicase                                                             | K17677 | IRC3                   |
| Type V   | orf03618_1 | COG0481 | GTP-binding protein LepA                                                      | K03596 | lepA                   |
|          | orf03619_1 | COG0681 | signal peptidase I                                                            | K03100 | lepB                   |
| Type VI  | orf04715_1 | COG3521 | hypothetical protein                                                          | K11906 | vasD, lip              |
|          | orf01541_1 | COG3521 | hypothetical protein                                                          | K11906 | vasD, lip              |
|          | orf04706_1 | COG0542 | type VI secretion ATPase, ClpV1 family                                        | K11907 | vasG, clpV             |
|          | orf03437_1 | COG3455 | type IV/VI secretion system protein, DotU family                              | K11892 | impK, ompA, vasF, dotU |
|          | orf04712_1 | COG3515 | ImpA domain-containing protein                                                | K11910 | vasJ                   |
|          | orf02779_1 | COG3518 | type VI secretion system lysozyme-related protein                             | K11905 | K11905                 |
|          | orf04714_1 | COG3520 | hypothetical protein                                                          | K11895 | impH, vasB             |

---

|            |         |                                                  |        |                        |
|------------|---------|--------------------------------------------------|--------|------------------------|
| orf04705_1 | COG3157 | hypothetical protein                             | K11903 | K11903, hcp            |
| orf02781_1 | COG3520 | type VI secretion protein, VC_A0111 family       | K11895 | impH, vasB             |
| orf04713_1 | COG3519 | hypothetical protein                             | K11896 | impG, vasA             |
| orf04703_1 | COG3455 | type IV/VI secretion system protein, DotU family | K11892 | impK, ompA, vasF, dotU |
| orf04979_1 | _       | _                                                | K11906 | vasD, lip              |
| orf04702_1 | COG3522 | hypothetical protein                             | K11893 | impJ, vasE             |
| orf02780_1 | COG3521 | type VI secretion lipoprotein, VC_A0113 family   | K11906 | vasD, lip              |
| orf02778_1 | COG3515 | ImpA domain protein                              | K11911 | vasL                   |
| orf04990_1 | COG3522 | hypothetical protein                             | K11893 | impJ, vasE             |
| orf04711_1 | COG3523 | hypothetical protein                             | K11891 | impL, vasK, icmF       |
| orf02783_1 | COG3523 | ImcF-related family protein                      | K11891 | impL, vasK, icmF       |
| orf04989_1 | COG3455 | hypothetical protein                             | K11892 | impK, ompA, vasF, dotU |

---
